# Supplementary material
Source: MDPI journal article supplement (https://www.mdpi.com/2227-9040/9/12/352)

---

The following ALERTS were generated. Each ALERT has the format

**test-name\_ALERT\_alert-type\_alert-level.**

Click on the hyperlinks for more details of the test.

---

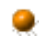

#### Alert level B

PLAT934\_ALERT\_3\_B Number of (Iobs-Icalc)/Sigma(W) > 10 Outliers .. 2 Check

---

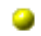

#### Alert level C

PLAT250\_ALERT\_2\_C Large U3/U1 Ratio for Average U(i,j) Tensor .... 2.2 Note  
PLAT341\_ALERT\_3\_C Low Bond Precision on C-C Bonds ..... 0.00638 Ang.  
PLAT906\_ALERT\_3\_C Large K Value in the Analysis of Variance ..... 4.807 Check  
PLAT911\_ALERT\_3\_C Missing FCF Refl Between Thmin & STh/L= 0.595 12 Report  
PLAT975\_ALERT\_2\_C Check Calcd Resid. Dens. 1.00A From O4 0.42 eA-3  
PLAT976\_ALERT\_2\_C Check Calcd Resid. Dens. 0.72A From O6 -0.45 eA-3  
PLAT976\_ALERT\_2\_C Check Calcd Resid. Dens. 0.85A From O1 -0.41 eA-3  
PLAT977\_ALERT\_2\_C Check Negative Difference Density on H11 -0.32 eA-3

---

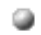

#### Alert level G

PLAT002\_ALERT\_2\_G Number of Distance or Angle Restraints on AtSite 11 Note  
PLAT004\_ALERT\_5\_G Polymeric Structure Found with Maximum Dimension 1 Info  
PLAT083\_ALERT\_2\_G SHELXL Second Parameter in WGHT Unusually Large 24.47 Why ?  
PLAT172\_ALERT\_4\_G The CIF-Embedded .res File Contains DFIX Records 7 Report  
PLAT173\_ALERT\_4\_G The CIF-Embedded .res File Contains DANG Records 3 Report  
PLAT301\_ALERT\_3\_G Main Residue Disorder .....(Resd 1 ) 24% Note  
PLAT860\_ALERT\_3\_G Number of Least-Squares Restraints ..... 10 Note  
PLAT883\_ALERT\_1\_G No Info/Value for \_atom\_sites\_solution\_primary . Please Do !  
PLAT909\_ALERT\_3\_G Percentage of I>2sig(I) Data at Theta(Max) Still 94% Note  
PLAT913\_ALERT\_3\_G Missing # of Very Strong Reflections in FCF .... 2 Note  
PLAT933\_ALERT\_2\_G Number of OMIT Records in Embedded .res File ... 10 Note  
PLAT978\_ALERT\_2\_G Number C-C Bonds with Positive Residual Density. 2 Info

---

- 0 **ALERT level A** = Most likely a serious problem - resolve or explain  
1 **ALERT level B** = A potentially serious problem, consider carefully  
8 **ALERT level C** = Check. Ensure it is not caused by an omission or oversight  
12 **ALERT level G** = General information/check it is not something unexpected

- 1 ALERT type 1 CIF construction/syntax error, inconsistent or missing data  
9 ALERT type 2 Indicator that the structure model may be wrong or deficient  
8 ALERT type 3 Indicator that the structure quality may be low  
2 ALERT type 4 Improvement, methodology, query or suggestion  
1 ALERT type 5 Informative message, check
- 

### Validation response form

Please find below a validation response form (VRF) that can be filled in and pasted into your CIF.

# start Validation Reply Form

\_vrf\_PLAT934\_2

;

PROBLEM: Number of (Iobs-Icalc)/Sigma(W) > 10 Outliers .. 2 Check

```

RESPONSE: ...
;
_vrf_PLAT250_2
;
PROBLEM: Large U3/U1 Ratio for Average U(i,j) Tensor ....      2.2 Note
RESPONSE: ...
;
_vrf_PLAT341_2
;
PROBLEM: Low Bond Precision on  C-C Bonds .....      0.00638 Ang.
RESPONSE: ...
;
_vrf_PLAT906_2
;
PROBLEM: Large K Value in the Analysis of Variance .....      4.807 Check
RESPONSE: ...
;
_vrf_PLAT911_2
;
PROBLEM: Missing FCF Refl Between Thmin & STh/L=      0.595      12 Report
RESPONSE: ...
;
_vrf_PLAT975_2
;
PROBLEM: Check Calcd Resid. Dens.  1.00A    From O4      0.42 eA-3
RESPONSE: ...
;
_vrf_PLAT976_2
;
PROBLEM: Check Calcd Resid. Dens.  0.72A    From O6      -0.45 eA-3
RESPONSE: ...
;
_vrf_PLAT977_2
;
PROBLEM: Check Negative Difference Density on H11      -0.32 eA-3
RESPONSE: ...
;
# end Validation Reply Form

```

---

It is advisable to attempt to resolve as many as possible of the alerts in all categories. Often the minor alerts point to easily fixed oversights, errors and omissions in your CIF or refinement strategy, so attention to these fine details can be worthwhile. In order to resolve some of the more serious problems it may be necessary to carry out additional measurements or structure refinements. However, the purpose of your study may justify the reported deviations and the more serious of these should normally be commented upon in the discussion or experimental section of a paper or in the "special\_details" fields of the CIF. checkCIF was carefully designed to identify outliers and unusual parameters, but every test has its limitations and alerts that are not important in a particular case may appear. Conversely, the absence of alerts does not guarantee there are no aspects of the results needing attention. It is up to the individual to critically assess their own results and, if necessary, seek expert advice.

### **Publication of your CIF in IUCr journals**

A basic structural check has been run on your CIF. These basic checks will be run on all CIFs submitted for publication in IUCr journals (*Acta Crystallographica*, *Journal of Applied Crystallography*, *Journal of Synchrotron Radiation*); however, if you intend to submit to *Acta Crystallographica Section C* or *E* or *IUCrData*, you should make sure that full publication checks are run on the final version of your CIF prior to submission.

### **Publication of your CIF in other journals**

Please refer to the *Notes for Authors* of the relevant journal for any special instructions relating to CIF submission.

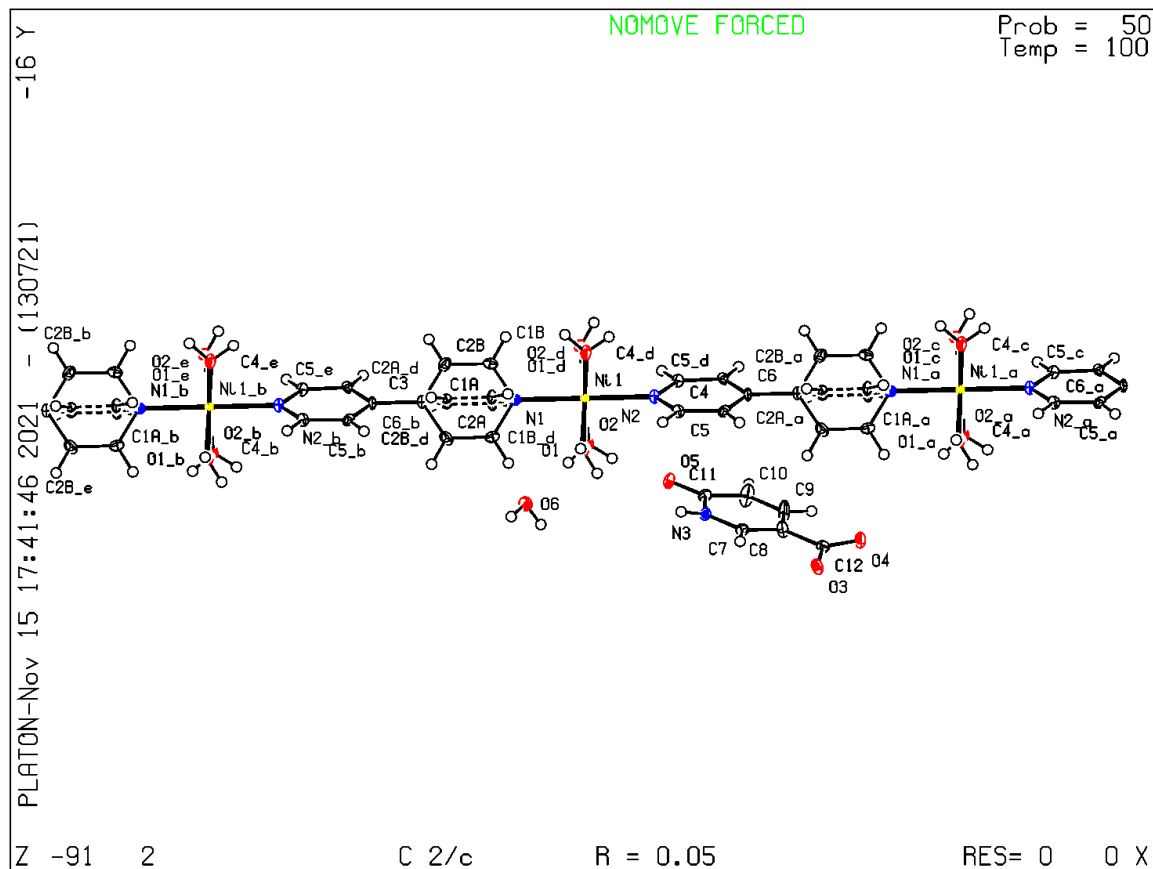

Supplement: s1 [file s1]
